# Supplementary material for: Naïve CD8 T cell IFNγ responses to a vacuolar antigen are regulated by an inflammasome-independent NLRP3 pathway and Toxoplasma gondii ROP5
Source: PubMed Central journal article supplement (PMC7480859; doi:10.1371/journal.ppat.1008327), 2020-08-27

(A)

Alternative start site ↓ Signal peptide cleavage site

CAST MNKDRPCRLNSRHAEDFSLVMSCQQRLAVVQGSFLCTMKMGRHVVILACFAALASTVAHGFRSSSYWNDPWPETGEDWA

GUY-DOS .....P.....

P89 .....P.....

RUB .....P.....

TgCATBR5 .....P.....

MAS .....A.....

GUY-KOE .....A.....

GUY-MAT .....A.....

VAND .....A.....

COUGAR .....Y.P.....

GPHT .....Y.P.....

BOF .....Y.P.....

GT1 .....Y.P.....

ME49 .....Y.P.....

VEG .....Y.P.....

CASTELLS .....Y.P.....T.....

**K<sup>b</sup> 96-103 epitope**

CAST EVVAQVKTTSERLYE **SVLAFFRI** TTSATKRY SAYKKEKQLRPEALQLPHMWHVRNEIWRITDDL RNAKDLRLLIRKQKA

GUY-DOS .....V.....

P89 .....V.....

RUB .....V.....

TgCATBR5 .....V.....

MAS .....V.....

GUY-KOE .....V.....

GUY-MAT .....V.....

VAND .....V.....

COUGAR .....V.....

GPHT .....V.....

BOF .....V.....

GT1 .....V.....

ME49 .....V.....

VEG .....V.....

CASTELLS .....V.....

CAST LISILEGMRDKGDLKHWD DTTNICKR KASGELREAEELVEREEEEYNIEAE

GUY-DOS .....K.....V.....

P89 .....K.....V.....

RUB .....K.....V.....

TgCATBR5 .....K.....V.....

MAS .....L.G...R...N...S.....V.....

GUY-KOE .....L.G...R...N...S.....V.....

GUY-MAT .....L.G...R...N...S.....V.....

VAND .....L.G...R...N...S.....V.....

COUGAR .....G...R...N...S.....I.....V.....

GPHT .....G...R...N...S.....V.....

BOF .....G...R...N...S.....V.....

GT1 .....G...R...N...S.....V.....

ME49 .....G...R...N...S.....V.....

VEG .....G...R...N...S.....V.....

CASTELLS .....RM.GN...N...S.....V.....

(B)

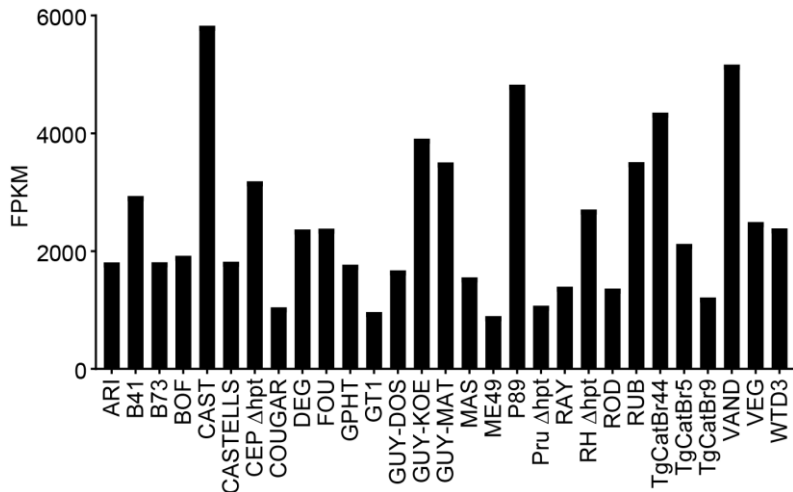

Supplement: ppat.1008327.s001.pdf [file ppat.1008327.s001.pdf]
